# Supplementary material for: Hierarchically structured MnO2 nanowires supported on hollow Ni dendrites for high-performance supercapacitors
Source: Royal Society of Chemistry journal article supplement (doi:10.1039/c3nr00209h), 2013-01-01
Supplement: c3nr00209h.pdf [file c3nr00209h.pdf]

Supporting Information

**Hierarchically Structured MnO<sub>2</sub> Nanowires Supported on Hollow Ni Dendrites for  
High-performance Supercapacitors**

*Zhipeng Sun, Shaik Firdoz, Esther Ying-Xuan Yap, Lan Li, and Xianmao Lu\**

Department of Chemical & Biomolecular Engineering  
National University of Singapore, 117576

\*E-mail: chelxm@nus.edu.sg

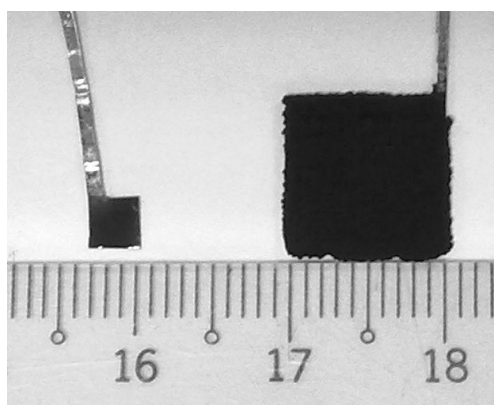

**Figure S1.** Digital photos of the Ni@MnO<sub>2</sub> electrodes deposited on 0.1- (left, 0.33cm×0.33cm) and 1-cm<sup>2</sup> (right, 1cm×1cm) Ni substrates.

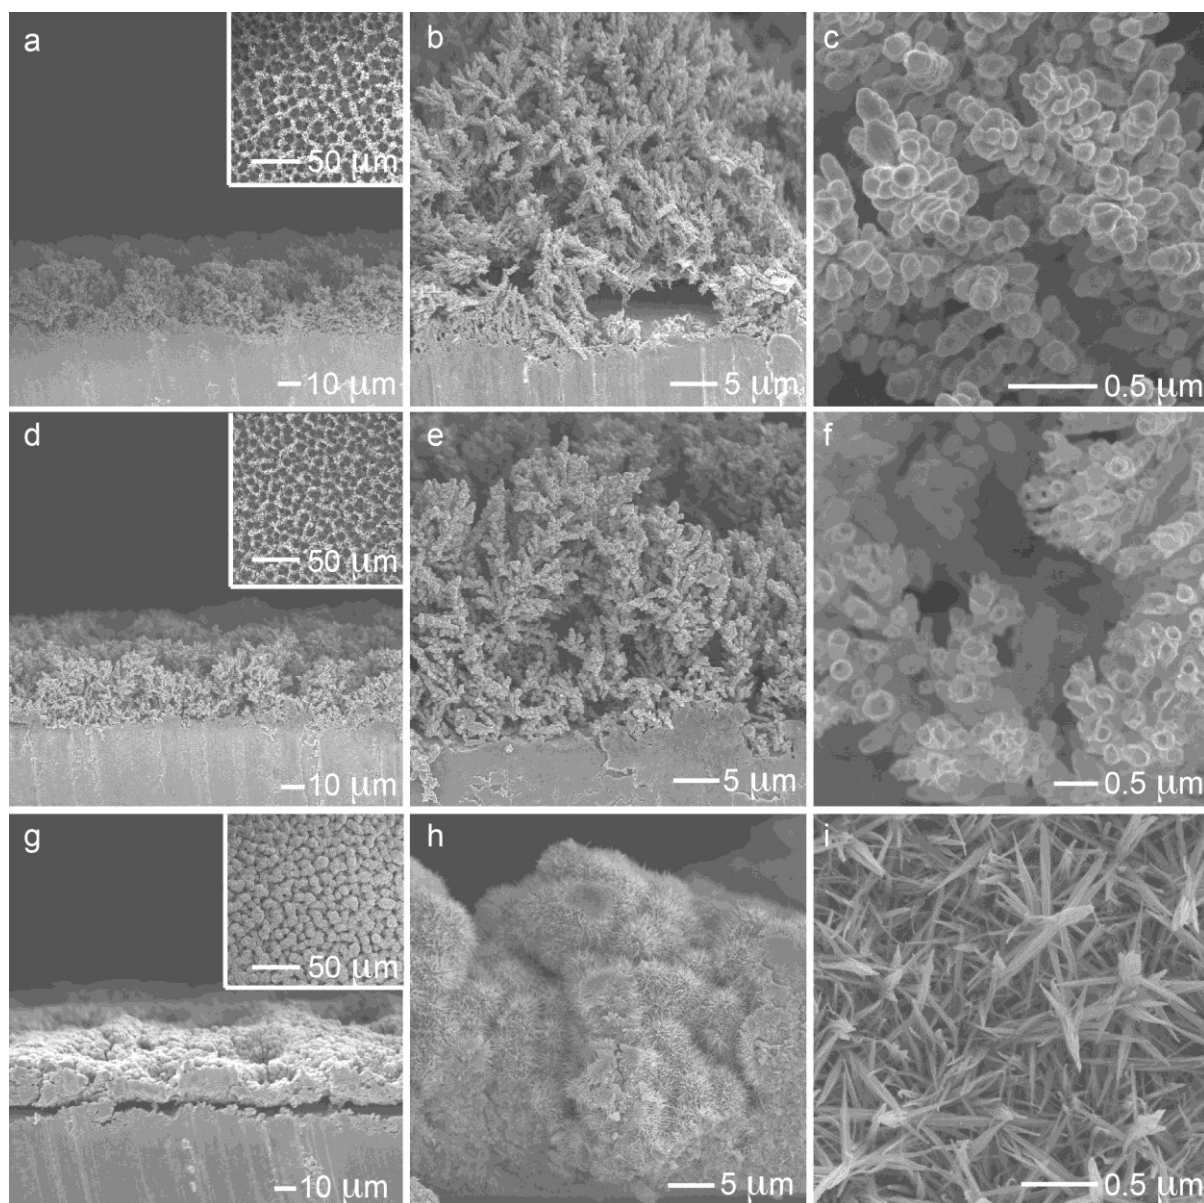

**Figure S2.** SEM images of the (a-c) Cu dendrites, (d-f) hollow Ni dendrites, and (g-i) hollow Ni dendrite-supported MnO<sub>2</sub> nanowires prepared on a square Ni foil with an area of 0.1 cm<sup>2</sup>. Panels (a, d, g) and the corresponding insets are low-magnification side- and top-view images, respectively. Panels (b, e, h) and (c, f, i) are high-magnification side- and top-view images, respectively.

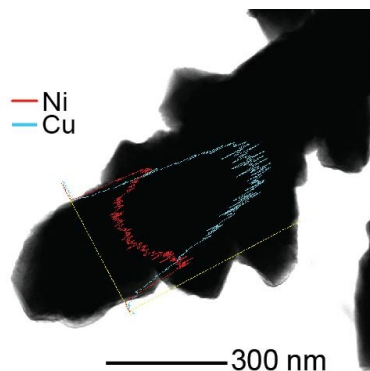

**Figure S3.** TEM image and elemental profile from EDX line scan showing the distribution of Ni and Cu across a Cu@Ni wire.

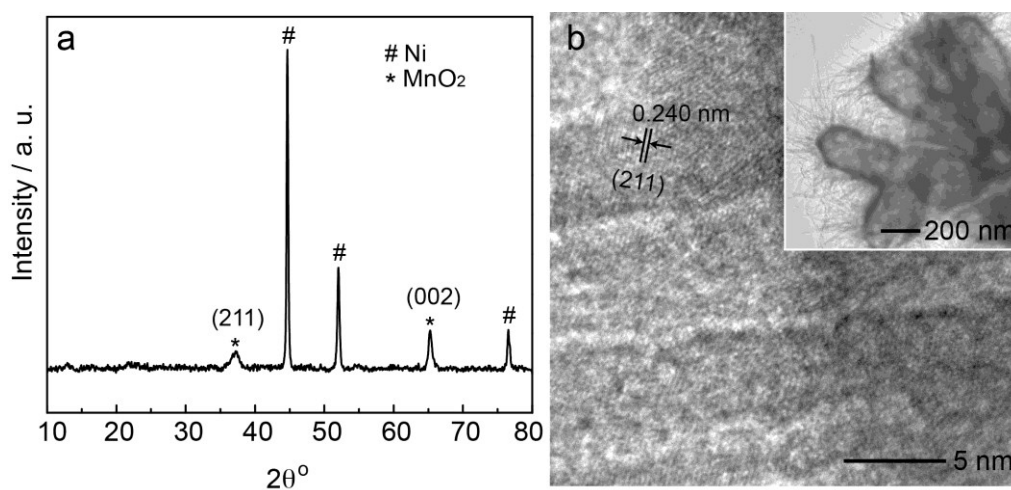

**Figure S4.** (a) XRD and (b) high-resolution TEM image of the Ni@MnO<sub>2</sub> structure. The three strong peaks located at  $2\theta = 44.5^\circ$ ,  $51.8^\circ$  and  $76.5^\circ$  are assigned to Ni (JCPDS: 04-0850). The other two peaks are corresponding to (211) and (002) reflections of  $\alpha$ -MnO<sub>2</sub> (JCPDS: 44-0141). From the HRTEM image, the lattice fringes show a d-spacing of 0.240 nm, which agrees well with (211) plane of MnO<sub>2</sub>.

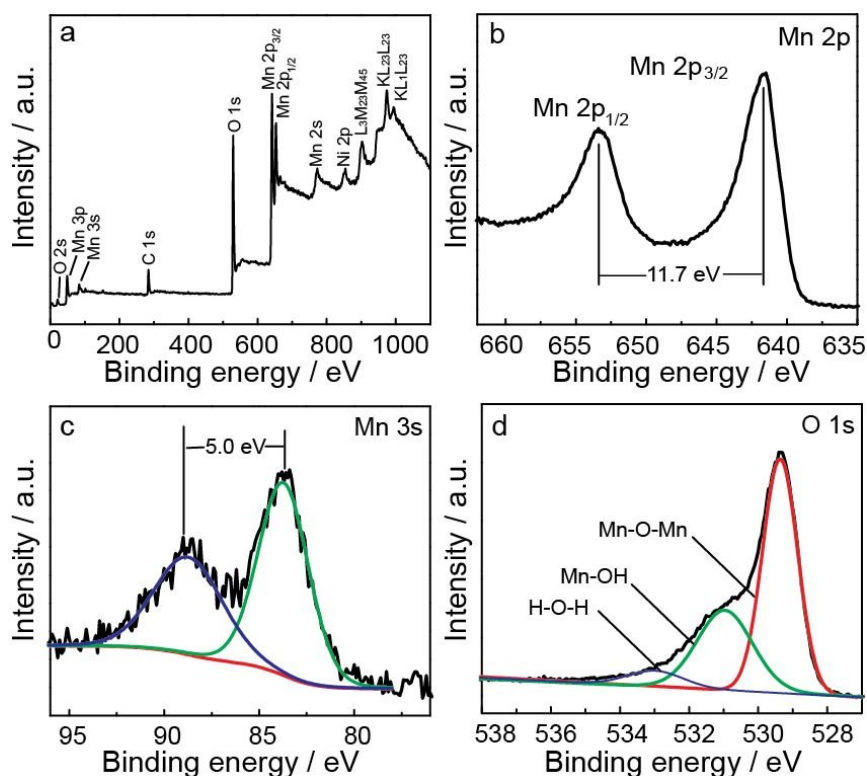

**Figure S5.** XPS spectra of the Ni hollow dendrite-supported MnO<sub>2</sub> nanowires. (a) Survey scan showing peaks of Mn, Ni, and O. (b) Mn 2p, (c) Mn 3s, and (d) O 1s spectra.

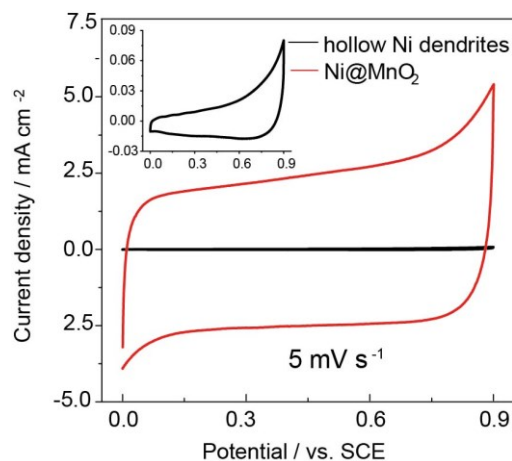

**Figure S6.** Comparison of the CVs for the hollow Ni dendrites and Ni@MnO<sub>2</sub> structure in 1 M Na<sub>2</sub>SO<sub>4</sub> at a scan rate of 5 mV s<sup>-1</sup>. Inset is the enlarged CV of the hollow Ni dendrites. The much smaller current from Ni dendrites indicates little contribution of capacitance from the Ni support.

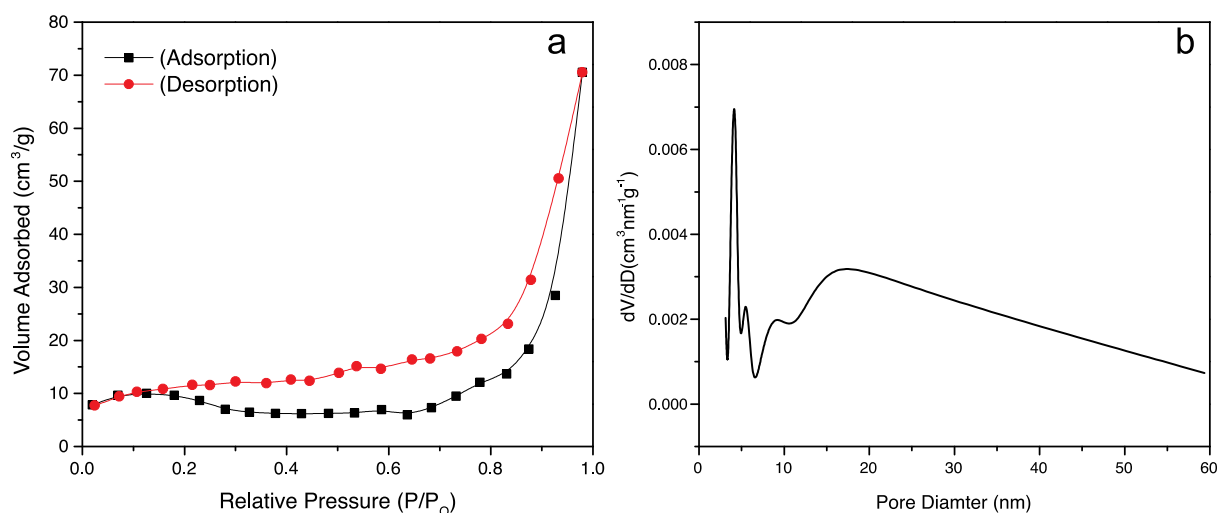

**Figure S7.** (a) N<sub>2</sub> adsorption/desorption isotherms at 77 K and (b) pore size distribution of the Ni@MnO<sub>2</sub> composite which was scraped off the Ni foil (1 cm<sup>2</sup>).

The BET surface area of the sample was analyzed by using the Nova-3000 Series, Quantachrome nitrogen adsorption apparatus. The sample was degassed for a period of 6 hours at 150 °C prior to nitrogen adsorption measurements. BET multipoint method was used for the determination of BET surface area by using the adsorption data in the relative pressure (P/P<sub>0</sub>) range of 0.05-0.3. The pore volume and average pore size of the sample was determined by taking the nitrogen adsorption volume at the relative pressure (P/P<sub>0</sub>) of 0.994. The pore sizes of the sample are mainly distributed at ~4 and ~15 nm. The BET surface area was found to be 23.4 m<sup>2</sup> g<sup>-1</sup>. This relatively low specific surface area could be partly attributed the ruptured hierarchical structure upon scraping off the substrate and the dense coating of MnO<sub>2</sub>.
